# Supplementary material for: Bee venom inhibits growth of human cervical tumors in mice
Source: PubMed Central journal article supplement (PMC4466684; doi:10.18632/oncotarget.3110), 2015-01-23
Supplement: oncotarget-06-7280-s001.pdf [file oncotarget-06-7280-s001.pdf]

## SUPPLEMENTARY FIGURE

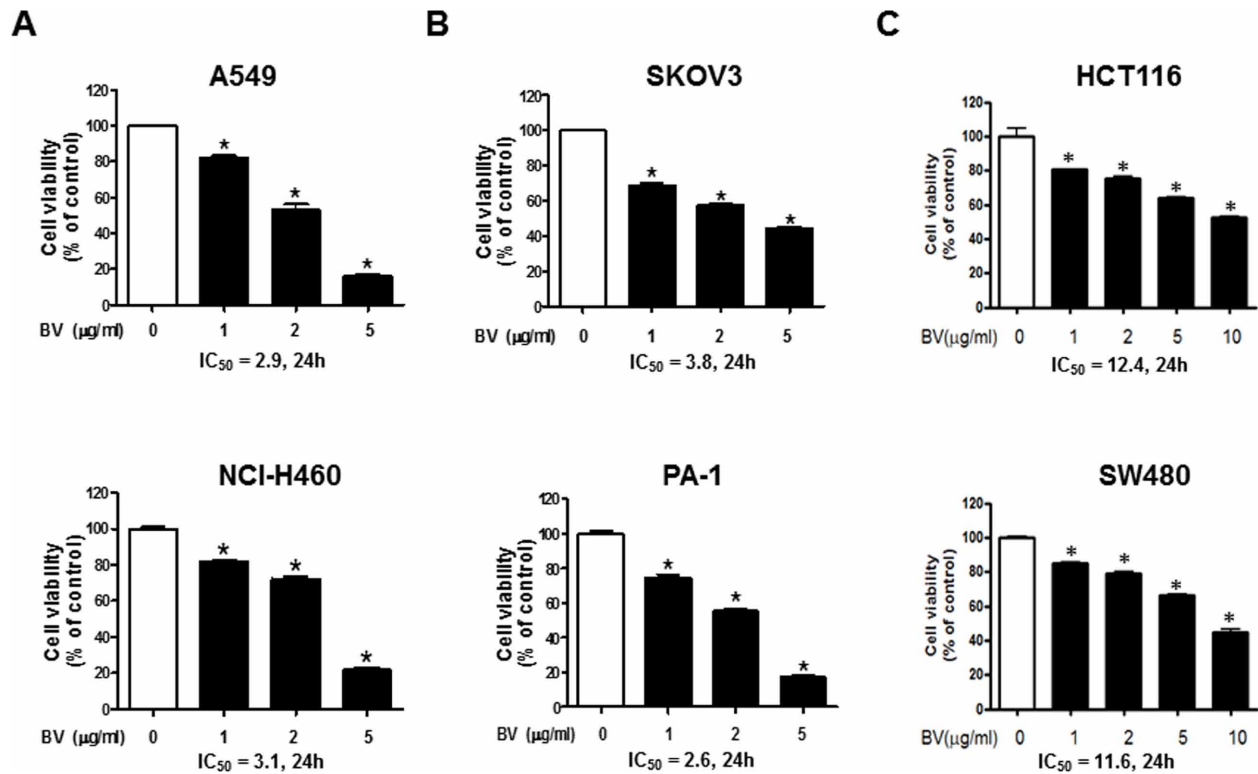

**Supplementary Figure S1: Effect of BV on cell viability of various cancer cells.** Concentration-dependent effect of BV on the several cancer cells; lung (A), ovarian (B) and colon (C) after 24 hr treatment. The data were expressed as the mean  $\pm$  S.D. of three experiments.  $*(P < 0.05)$  indicates statistically significant differences from the control group.
